# Supplementary material for: Photoacid generator–polymer interaction on the quantum yield of chemically amplified resists for extreme ultraviolet lithography
Source: Royal Society of Chemistry journal article supplement (doi:10.1039/c8tc01446a), 2018-01-01

## Supplementary information

### **Photoacid generator-polymer interaction on the quantum yield of chemically amplified resists for extreme ultraviolet lithography**

**Roberto Fallica and Yasin Ekinici**

Paul Scherrer Institute, 5232 Villigen PSI, Switzerland

#### Contents

|                 |    |
|-----------------|----|
| Figure S1. .... | S1 |
| Figure S2. .... | S2 |
| Figure S3. .... | S3 |
| Figure S4. .... | S4 |

**Figure S1.**

Schematic of the experimental setup for the measurement of transmittance of thin photoresist film spin coated on a  $\text{SiN}_x$  membrane. The beam is generated by the undulator source and focused to a spatial filter pinhole of 30  $\mu\text{m}$  diameter and expands about 12 meter resulting in a relatively homogenous beam over several millimeters with an average flux of about 30  $\text{mW}/\text{cm}^2$ . A square open-frame mask ( $0.5 \times 0.5 \text{ mm}^2$ ) is located in front of the sample to crop out the beam tail. The transmittance intensity of the light passing through a thin film, spin-coated on a silicon nitride membrane is measured as a function of time during the exposure. A photodiode is located behind the sample and its photocurrent is collected at a high rate (50 Hz) using a Keithley 6430 amperometer (see Supporting information S1).

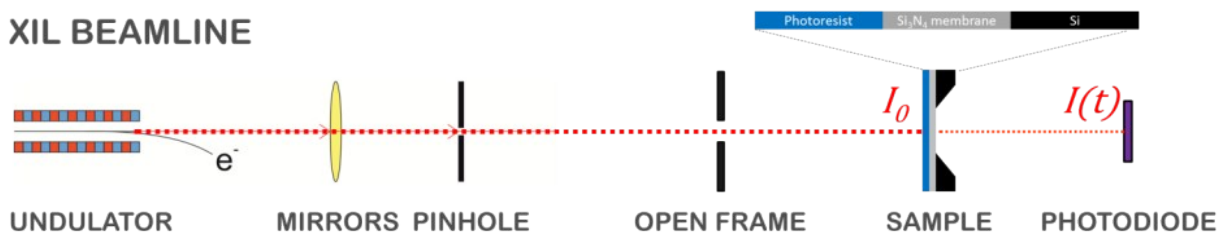

**Figure S2.**

Example of extraction of Dill parameters from a transmittance measurement, as a function of time, for thin photoresist films. The transmittance  $T_X$  is measured as the photocurrent (Y-axis, in ampere) flowing in a photodiode located behind the sample, while the sample itself is exposed to EUV light for time equal to the time-to-clear (X-axis, in s). The linear absorption coefficient  $\alpha$  of the pristine sample is extracted from the  $T_X$  at the beginning of the exposure ( $t = 0$ ). The unbleachable Dill parameter  $B$  is extracted from the  $T_X$  at the end of the exposure, i.e., when the sample is fully exposed (green dashed line). The bleachable Dill parameter  $A$  is given by the relative variation of transmittance from the beginning to the end of the exposure. The Dill parameter  $C$  is proportional to the slope of the variation of photocurrent at the beginning of the exposure (red dashed line).

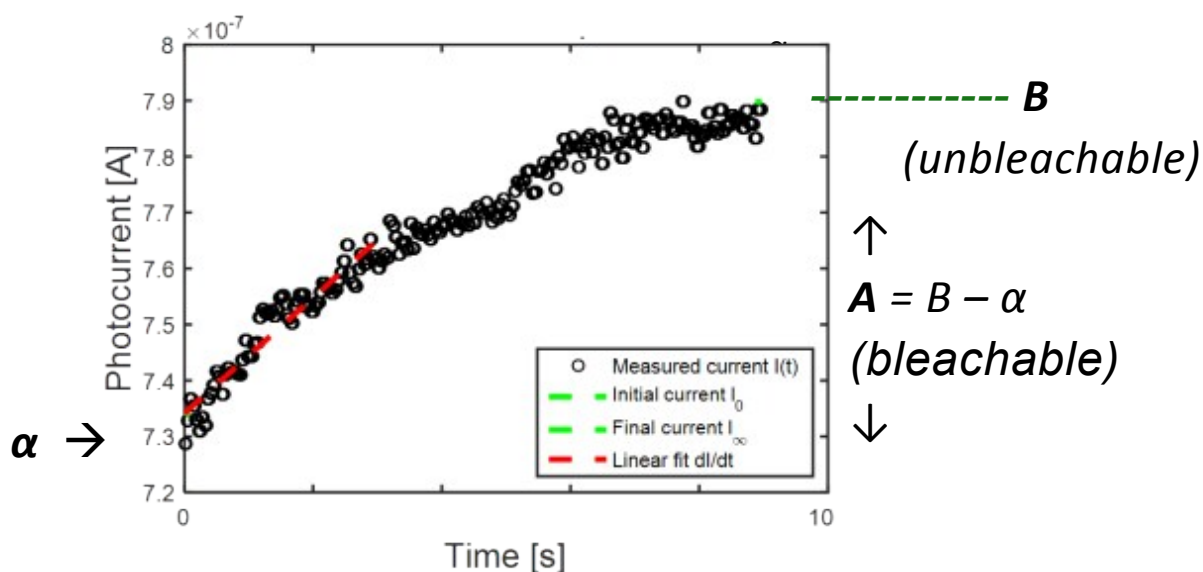

**Figure S3.**

Dosage curves for the samples of chemically amplified resists: samples with photoacid generator (top) and without (bottom).

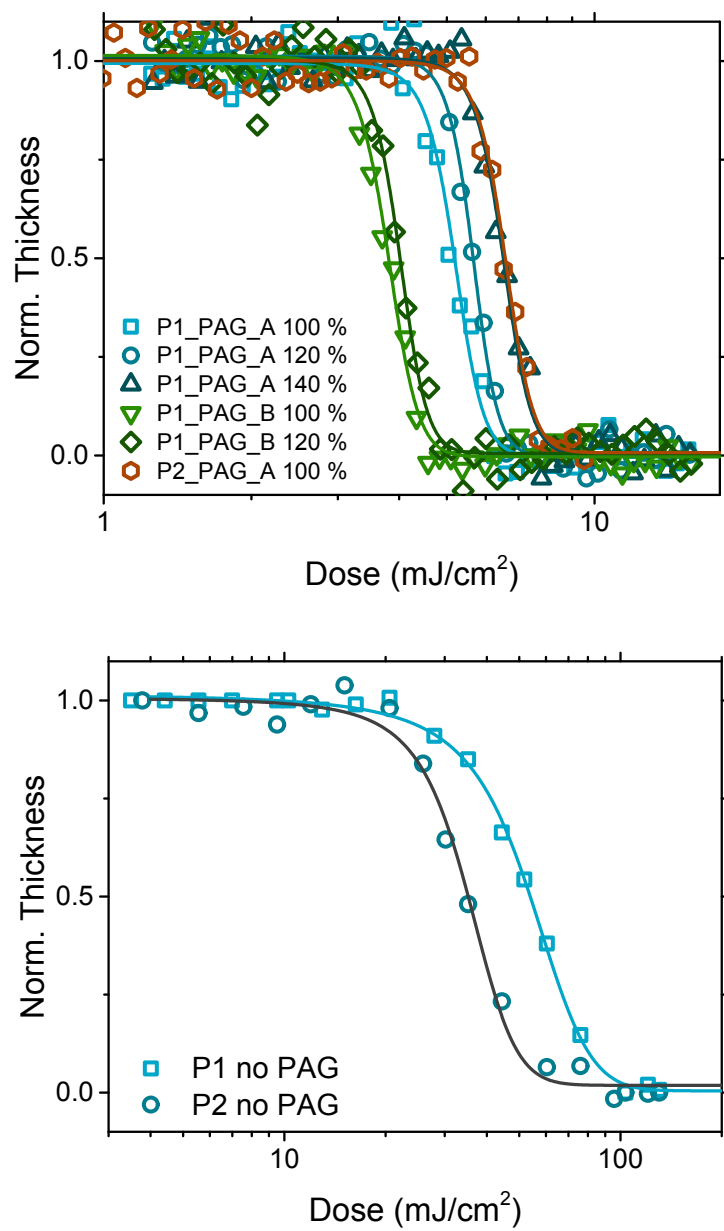

**Figure S4.**

Raw data of measured transmittance (photocurrent in the diode as a function of time) through the thin photoresist films investigated in this work.

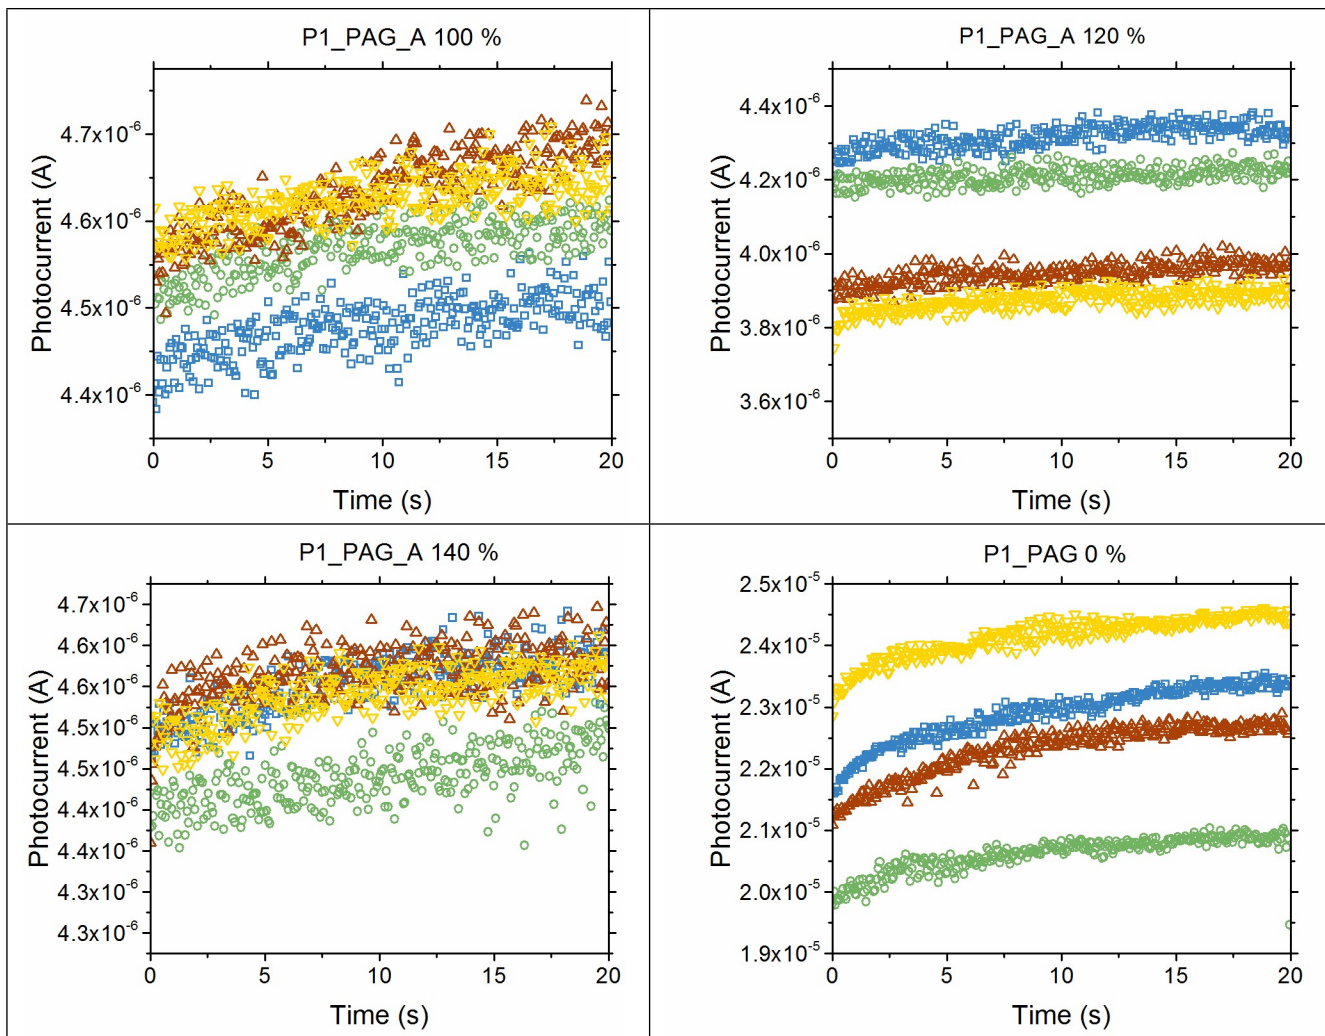

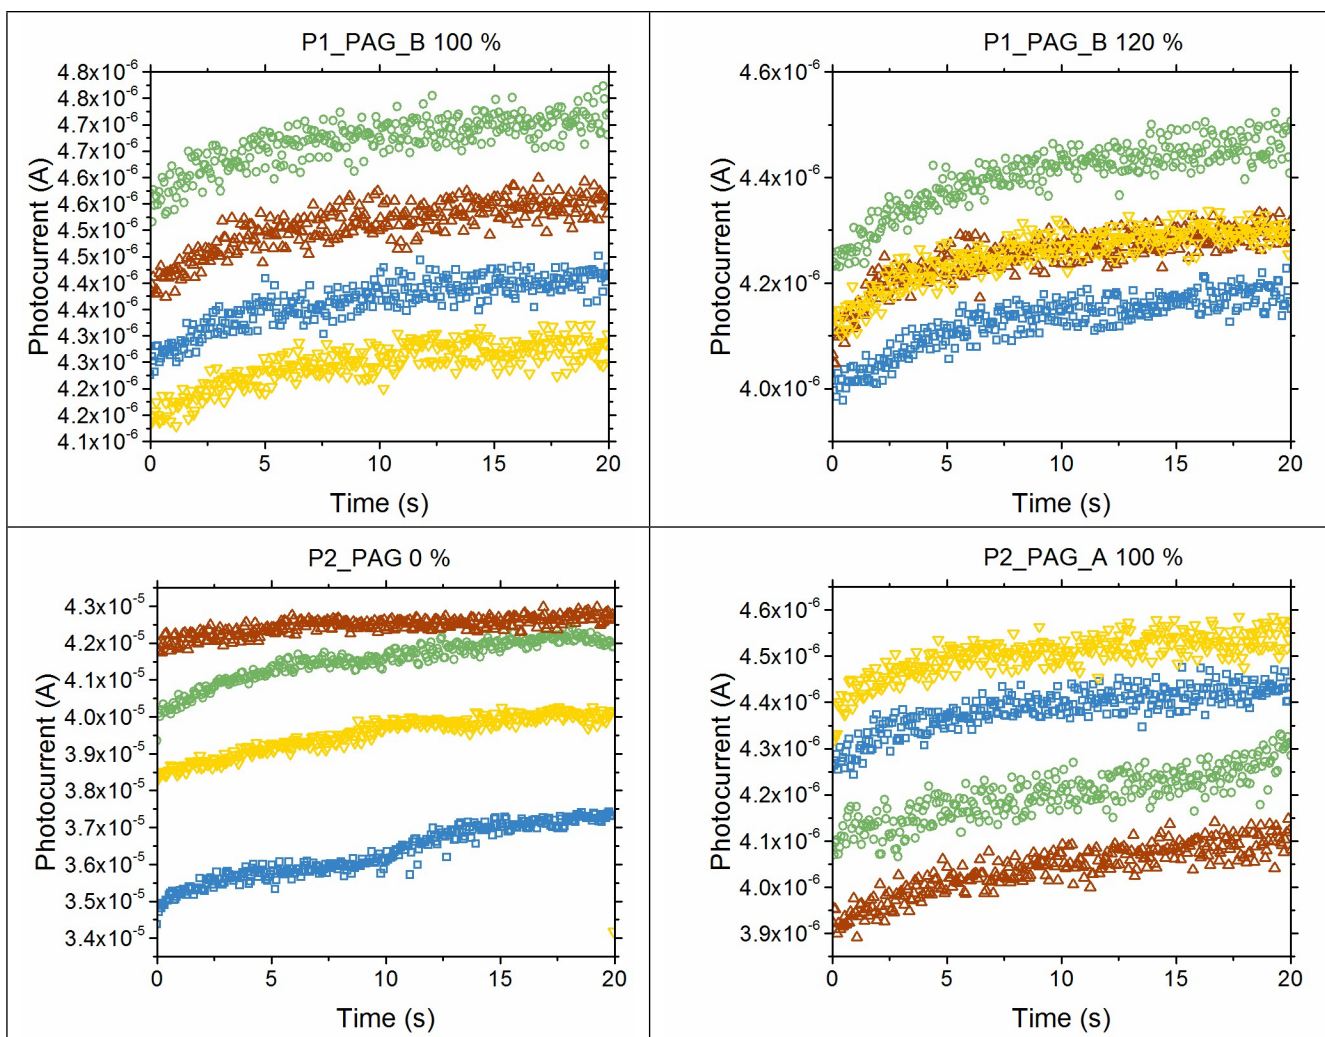

Supplement: c8tc01446a1.pdf [file c8tc01446a1.pdf]
